# Supplementary material for: Comparative investigation of interactions of hydrogen, halogen and tetrel bond donors with electron-rich and electron-deficient π-systems
Source: Royal Society of Chemistry journal article supplement (doi:10.1039/c9ra08007d), 2019-01-01
Supplement: c9ra08007d1.pdf [file c9ra08007d1.pdf]

# Comparative investigation of interactions of hydrogen, halogen and tetrel bond donors with electron-rich and electron-deficient $\pi$ -systems

Received 00th January 20xx,  
Accepted 00th January 20xx

DOI: 10.1039/x0xx00000x

Mahmoud A. A. Ibrahim,<sup>\*a</sup> Ossama A. M. Ahmed,<sup>a,b</sup> Nayra A. M. Moussa,<sup>a</sup> Sabry El-Taher<sup>b</sup> and Hussien Moustafa<sup>b</sup>

---

<sup>a</sup> Chemistry Department, Faculty of Science, Minia University, Minia 61519, Egypt.

<sup>b</sup> Department of Chemistry, Faculty of Science, Cairo University, Giza, Egypt.

† Electronic Supplementary Information (ESI) available: [details of any supplementary information available should be included here]. See

DOI: 10.1039/x0xx00000x

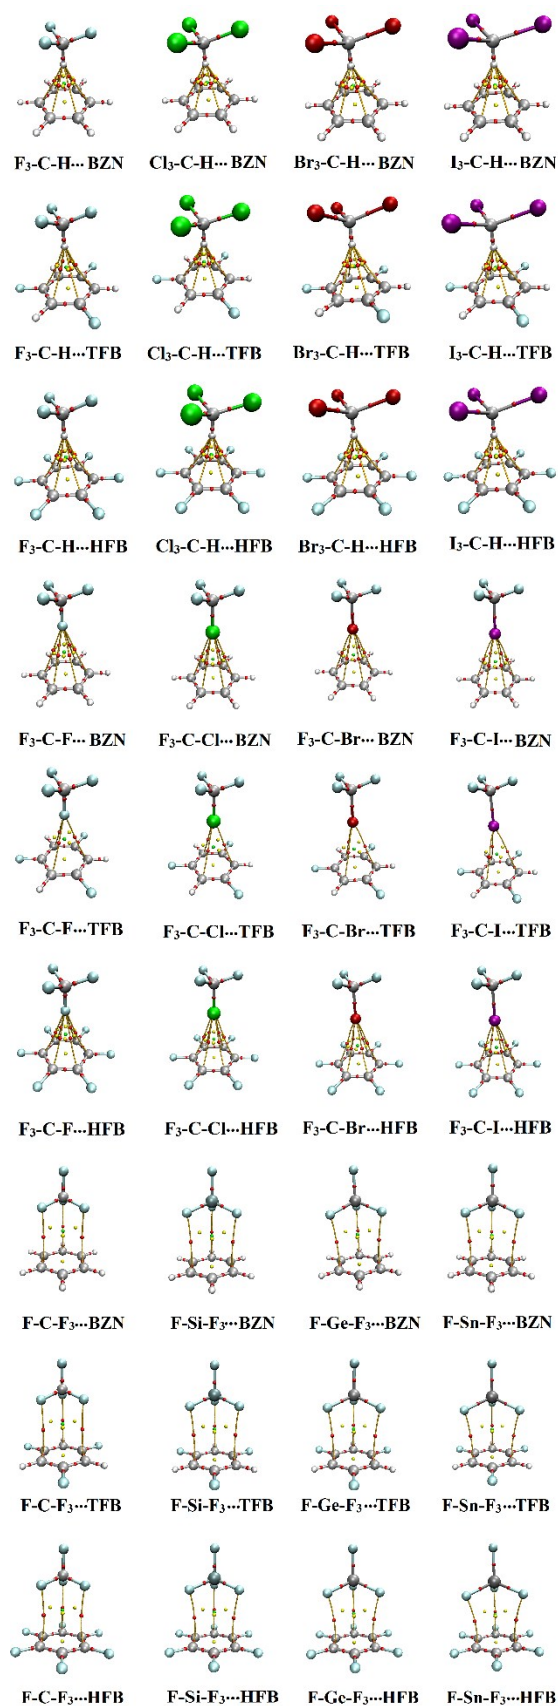

**Fig. S1.** QAIM diagrams of  $X_3-C-H\cdots$ ,  $F_3-C-X\cdots$  and  $F-T-F_3\cdots\pi$ -system (where  $X = F, Cl, Br$  and  $I$ ,  $T = C, Si, Ge$  and  $Sn$ , and  $\pi$ -system =  $BNZ, TFB$ , and  $HFB$ ) complexes. Red dots indicate the locations of bond critical points at the bond paths between the monomers at the most favorable  $H/\sigma$ -atom $\cdots\pi$ -system distance.

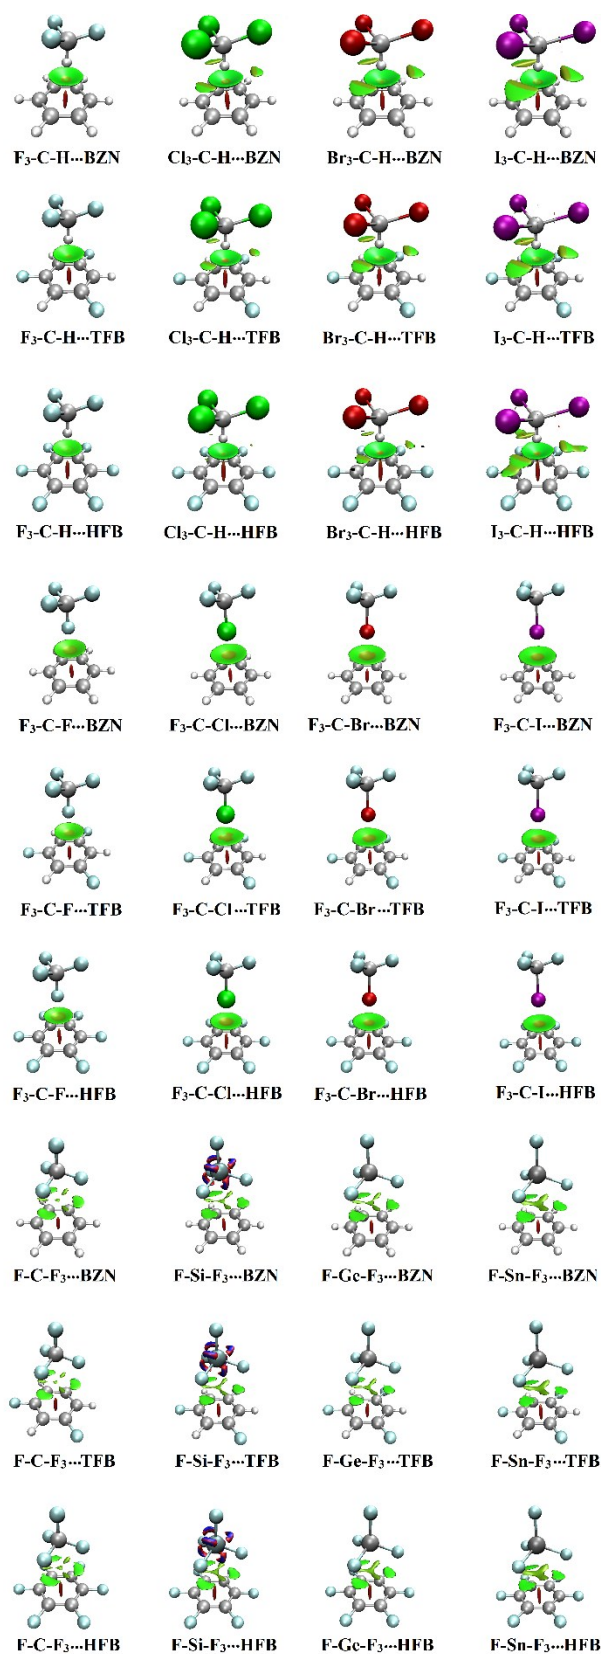

**Fig. S2.** Noncovalent interaction (NCI) diagrams of  $X_3\text{-C-H}\cdots$ ,  $\text{F}_3\text{-C-X}\cdots$ , and  $\text{F-T-F}_3\cdots\pi$ -system (where  $X = \text{F, Cl, Br}$  and  $\text{I}$ ,  $\text{T} = \text{C, Si, Ge}$  and  $\text{Sn}$ , and  $\pi$ -system =  $\text{BNZ}$ ,  $\text{TFB}$ , and  $\text{HFB}$ ) complexes. The isosurfaces are plotted with a reduced density gradient value of 0.50 au and they are colored from blue to red according to  $\text{sign}(\lambda_2)\rho$  ranging from  $-0.035$  to  $0.020$  au.
